# Supplementary material for: Beneficial Metabolic Effects of Rapamycin Are Associated with Enhanced Regulatory Cells in Diet-Induced Obese Mice
Source: PLOS journal article supplement (doi:10.1371/journal.pone.0092684), 2014-04-07
Supplement: S8 (10.1371/journal.pone.0092684.s008) [file journal.pone.0092684.s008]

### Top 5 enriched pathways in Immune Cell Trafficking

|                                | p-Value  | Predicted Activation State | # Molecules |
|--------------------------------|----------|----------------------------|-------------|
| Cell movement of myeloid cells | 5,54E-12 | Increased                  | 54          |
| Cell movement of phagocytes    | 3,39E-11 | Increased                  | 52          |
| Cell movement of granulocytes  | 6,00E-08 | Increased                  | 38          |
| Cell movement of neutrophils   | 5,67E-06 | Increased                  | 28          |
| Recruitment of phagocytes      | 6,69E-06 | Increased                  | 25          |

### Top 5 enriched pathways in Inflammatory Response

|                             | p-Value  | Predicted Activation State | # Molecules |
|-----------------------------|----------|----------------------------|-------------|
| Immune response             | 3.20E-20 | Increased                  | 144         |
| Inflammatory response       | 7.69E-16 | Increased                  | 70          |
| Cell movement of phagocytes | 3.39E-11 | Increased                  | 52          |
| Chemotaxis of leukocytes    | 4.15E-11 | Increased                  | 34          |
| Quantity of phagocytes      | 3.76E-10 | None                       | 53          |
